# Supplementary material for: Construction of 2D/2D layered g-C3N4/Bi12O17Cl2 hybrid material with matched energy band structure and its improved photocatalytic performance
Source: Royal Society of Chemistry journal article supplement (doi:10.1039/c8ra03981j), 2018-01-01
Supplement: c8ra03981j1.pdf [file c8ra03981j1.pdf]

**Construction of 2D/2D layered g-C<sub>3</sub>N<sub>4</sub>/Bi<sub>12</sub>O<sub>17</sub>Cl<sub>2</sub> hybrid material with matched energy band structure and its improved photocatalytic performance**

Lei Shi <sup>a\*</sup>, Weiwei Si <sup>a</sup>, Fangxiao Wang <sup>c</sup> and Wei Qi <sup>b\*</sup>

a: College of Chemistry, Chemical Engineering and Environmental Engineering, Liaoning Shihua University, Fushun 113001, China

b: Shenyang National Laboratory for Materials Science, Institute of Metal Research, Chinese Academy of Sciences, Shenyang 110016, China

c: College of Chemistry, Chemical Engineering and Material Science, Shandong Normal University, Jinan 250014, China

\*Corresponding author: Lei Shi, [shilei\\_hit@qq.com](mailto:shilei_hit@qq.com); Wei Qi, [wqi@imr.ac.cn](mailto:wqi@imr.ac.cn)

Tel: +86-02456861842

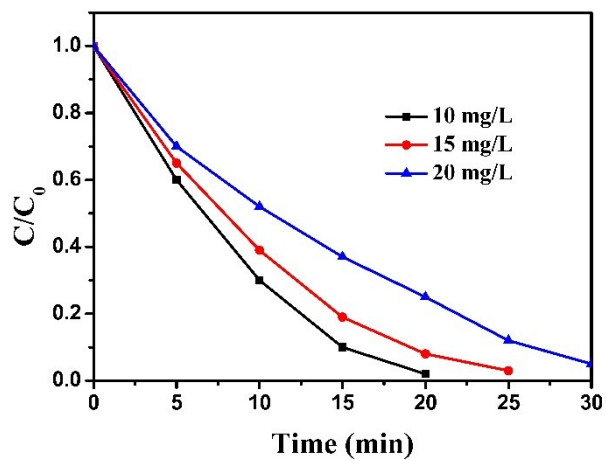

**Fig. S1** The photodegradation curves of various concentration of RhB over g-  
 $C_3N_4/Bi_{12}O_{17}Cl_2$  (3 wt%)

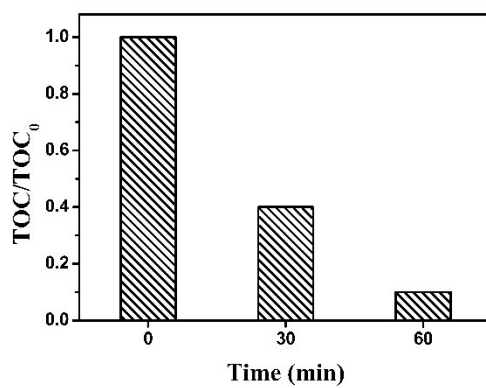

**Fig. S2** TOC removal during RhB degradation over g- $C_3N_4/Bi_{12}O_{17}Cl_2$  (3 wt%)

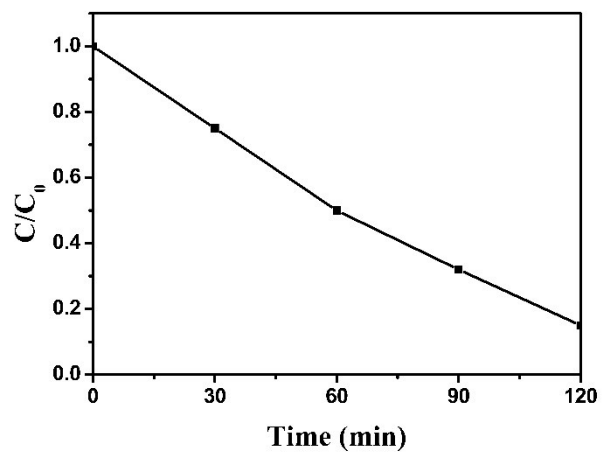

**Fig. S3** The photodegradation curve of MO over g-C<sub>3</sub>N<sub>4</sub>/Bi<sub>12</sub>O<sub>17</sub>Cl<sub>2</sub> (3 wt%)
